# Supplementary material for: Unusual renormalization group (RG) flow and temperature-dependent phase transition in strongly-insulating monolayer epitaxial graphene
Source: Royal Society of Chemistry journal article supplement (doi:10.1039/c7ra05463g), 2017-01-01
Supplement: c7ra05463g1.pdf [file c7ra05463g1.pdf]

## Supplementary Information

### Unusual renormalization group (RG) flow and temperature-dependent phase transition in strongly-insulating monolayer epitaxial graphene

Lung-I Huang<sup>a,b</sup>, Yanfei Yang<sup>a,c</sup>, Chieh-Wen Liu<sup>d,a</sup>, Randolph E. Elmquist<sup>a</sup>,  
Shun-Tsung Lo<sup>d\*</sup>, Fan-Hung Liu<sup>d</sup>, and Chi-Te Liang<sup>b,c,d\*</sup>

<sup>a</sup>*National Institute of Standards and Technology (NIST), Gaithersburg, MD 20899, USA*

<sup>b</sup>*Department of Physics, National Taiwan University, Taipei 106, Taiwan*

<sup>c</sup>*Department of Physics, Georgetown University, Washington, DC 20057, USA*

<sup>d</sup>*Graduate Institute of Applied Physics, National Taiwan University, Taipei 106, Taiwan*

<sup>e</sup>*Department of Physics, Stanford University, Stanford, CA 94305, USA*

\* [ctliang@phys.ntu.edu.tw](mailto:ctliang@phys.ntu.edu.tw) and [shuntsunglo@mail.ncku.edu.tw](mailto:shuntsunglo@mail.ncku.edu.tw)

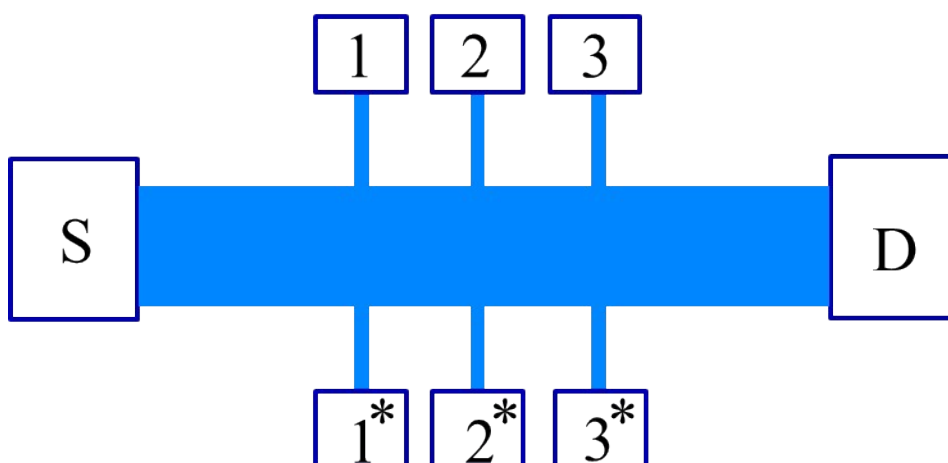

Figure S1 Schematic diagram showing a monolayer epitaxial graphene (EG) sample. S and D correspond to source and drain contacts. 1, 2, 3, 1\*, 2\* and 3\* are voltage probes. Channel dimensions, which are the same for all devices studied, are  $L = 0.6$  mm,  $W = 0.1$  mm, with voltage contacts spaced 0.1 mm apart along both sides of the device.

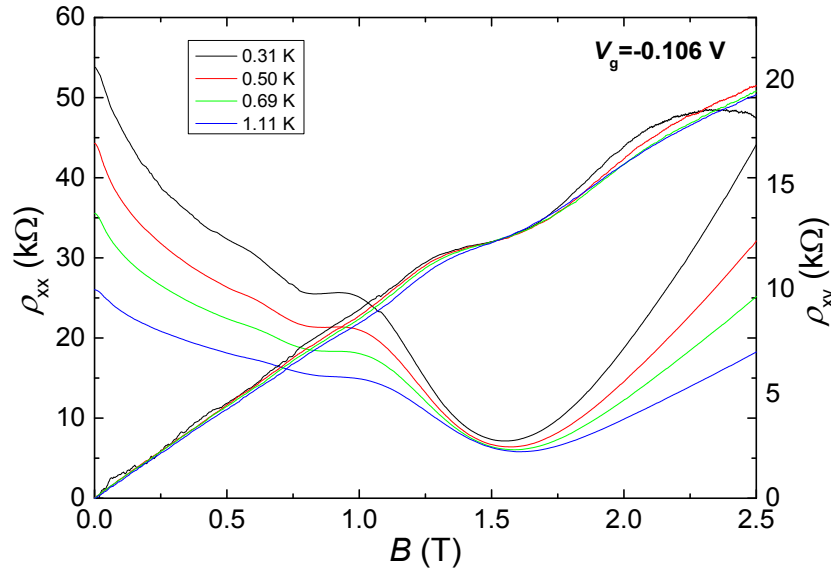

Figure 2 (a)  $\rho_{xx}(B)$  and  $\rho_{xy}(B)$  of a disordered GaAs-based electron system at various temperatures  $T$  [Ref. 1]. The device is always in the insulating phase in the sense that  $\rho_{xx}(B)$  decreases with increasing  $T$ .

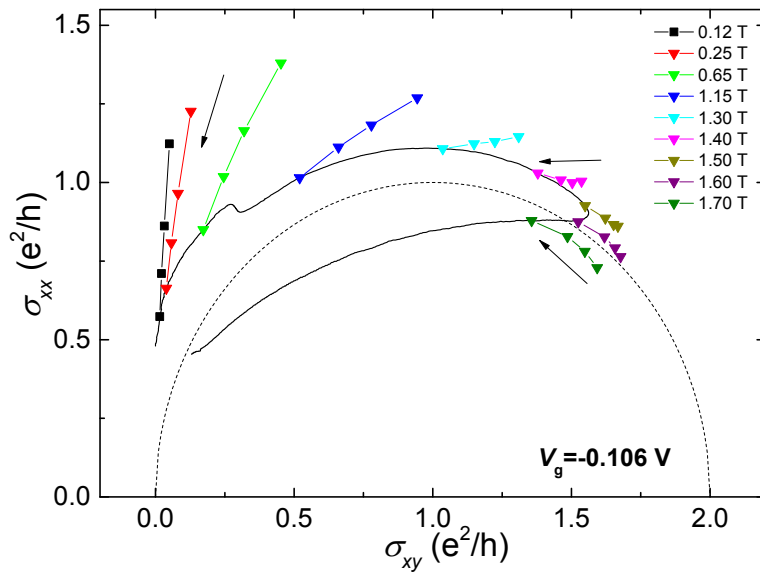

Figure 2 (b) The corresponding RG flow derived from the data in Fig. 2(a). No cusp-like RG flow is observed. The arrows indicate the flows from high temperature-data (1.11 K) to low-temperature data (0.31 K). The solid curve corresponds to the data taken at  $T=0.31$  K. The dotted curve represents the theoretical expected semi-circle.

## References

1 T.-Y. Huang, C. F. Huang, G. H. Kim, C. P. Huang, C.-T. Liang, and D. A. Ritchie, *Chin. J. Phys.*, 2009, 47, 401-407

2 S. H. Song, D. Shahar, D. C. Tsui, Y. H. Xie, and D. Monroe, *Phys. Rev. Lett.*, 1997, 78, 2200-2203
